# Supplementary material
Source: MDPI journal article supplement (https://www.mdpi.com/2227-9717/10/12/2662)
Supplement: s1 [file s1]

# Bioenergy, Electricity, Biogas Production, and Emission Reduction using the Anaerobic Digestion of Organic Municipal Solid Waste in Campinas, One of the Largest Brazilian Cities

Lívia Alencar Pacheco <sup>1</sup>, Jenniffer Tamayo-Peña <sup>1</sup>, Bruna de Souza Moraes <sup>2</sup> and Telma Teixeira Franco <sup>1,\*</sup>

<sup>1</sup> School of Chemical Engineering, University of Campinas, Campinas 13083-852, Brazil

<sup>2</sup> Interdisciplinary Center of Energy Planning, University of Campinas, Campinas 13083-896, Brazil

\* Correspondence: tfranco@unicamp.br

**Table S1.** Parameters used to estimate electricity generation potential and environmental and economic impacts.

| Data                                                                                                        | Value        | Source        |
|-------------------------------------------------------------------------------------------------------------|--------------|---------------|
| FFW (NmLCH <sub>4</sub> gVS <sup>-1</sup> )                                                                 | 381.9 ± 14.5 | Present study |
| GFW (NmLCH <sub>4</sub> gVS <sup>-1</sup> )                                                                 | 294.5 ± 15.6 | Present study |
| PFW (NmLCH <sub>4</sub> gVS <sup>-1</sup> )                                                                 | 373.3 ± 31.2 | Present study |
| OFMSW (NmLCH <sub>4</sub> gVS <sup>-1</sup> )                                                               | 410.7 ± 24.9 | Present study |
| Population in Campinas                                                                                      | 1,213,792    | [8]           |
| Number of households                                                                                        | 348,268      | [66]          |
| Energy consumption (MWh)                                                                                    | 1,099,629    | [67]          |
| Electric energy price (R\$ kWh <sup>-1</sup> )                                                              | 0.62         | [67]          |
| Conversion of biomethane to diesel (L diesel m <sup>-3</sup> CH <sub>4</sub> )                              | 1.0          | [43]          |
| Waste generated in Campinas (t day <sup>-1</sup> )                                                          | 1,301.7      | [10]          |
| Distance from Campinas to Paulínia (km)                                                                     | 25           | [10]          |
| Compactor truck capacity in Campinas (m <sup>3</sup> )                                                      | 15           | [68]          |
| Specific Weight MSW (t m <sup>-3</sup> )                                                                    | 0.65         | [68]          |
| Vehicle methane (%)                                                                                         | 90           | [43]          |
| Heavy vehicle (diesel consumption), $\gamma_{\text{diesel}}$ (km L <sup>-1</sup> )                          | 2.2          | [43]          |
| Biomethane consumption (heavy-duty vehicles), $\gamma_{\text{CH}_4}$ (km Nm <sup>-3</sup> CH <sub>4</sub> ) | 2.02         | [43]          |
| CO <sub>2</sub> emission factor (diesel), $E_f$ (kgCO <sub>2</sub> L <sup>-1</sup> )                        | 2.67         | [69]          |
| Diesel price, Price <sub>diesel</sub> (R\$ L <sup>-1</sup> )                                                | 3.211        | [70]          |
| Biomethane price, Price <sub>CH<sub>4</sub></sub> (R\$ Nm <sup>-3</sup> CH <sub>4</sub> )                   | 0.55         | [43]          |

1 US\$ = BRL 5.27

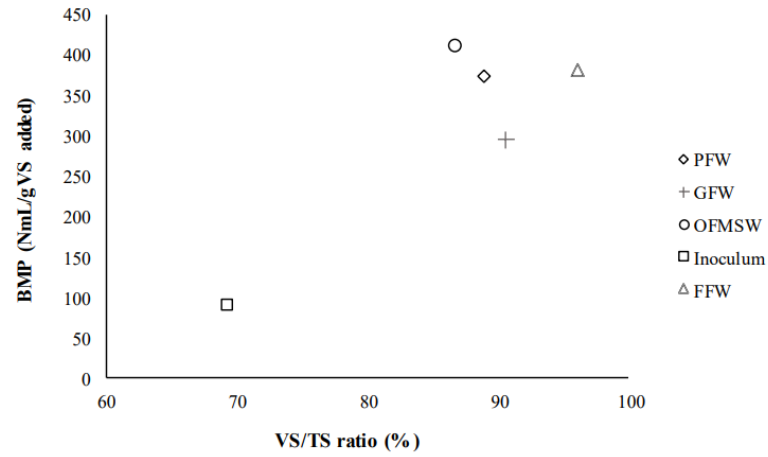

**Figure S1.** Relationship between VS/TS ratio and methane production.

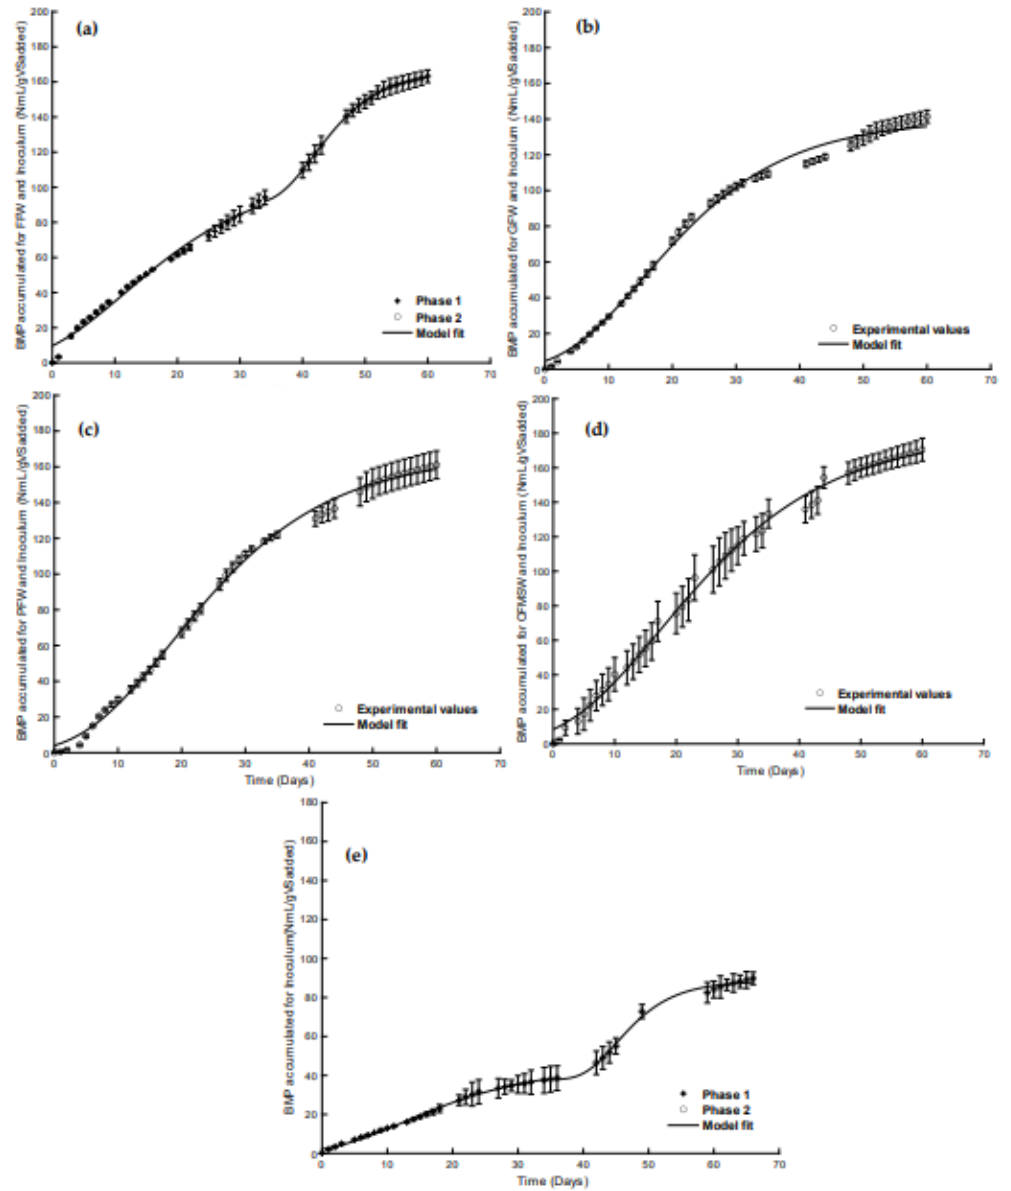

**Figure S2.** Modified Gompertz model results for the BMP experiment: (a) FFW + inoculum; (b) GFW + inoculum; (c) PFW + inoculum; (d) OFMSW + inoculum and (e) Inoculum.

## References Supplementary Material

1. IBGE. Campinas Panorama Available online: <https://cidades.ibge.gov.br/brasil/sp/campinas/panorama> (accessed on 1 July 2020).
2. CETESB *Inventário Estadual de Resíduos Sólidos Urbanos*; Companhia Ambiental do Estado de São Paulo: São Paulo, SP, Brazil, 2020;
3. Ornelas-Ferreira, B.; Lobato, L.C.S.; Colturato, L.F.D.; Torres, E.O.; Pombo, L.M.; Pujatti, F.J.P.; Araújo, J.C.; Chernicharo, C.A.L. Strategies for Energy Recovery and Gains Associated with the Implementation of a Solid State Batch Methanization System for Treating Organic Waste from the City of Rio de Janeiro - Brazil. *Renew. Energy* **2020**, *146*, 1976–1983, doi:10.1016/j.renene.2019.08.049.
4. IBGE. Características Da População e Dos Domicílios. Available online: <https://cidades.ibge.gov.br/brasil/sp/campinas/pesquisa/23/24304> (accessed on 5 August 2020).
5. ANEEL Ranking Das Tarifas Available online: <http://www.aneel.gov.br/ranking-das-tarifas> (accessed on 15 August 2020).
6. ABLP. *Limpeza Pública - Coleta e Transporte*; Associação Brasileira de Resíduos Sólidos e Limpeza Pública: São Paulo, SP, Brazil, 2015;
7. MMA. *Primeiro Inventário Nacional de Emissões Atmosféricas Por Veículos Automotores Rodoviários*; Ministério do Meio Ambiente Secretaria de Mudanças Climáticas e Qualidade Ambiental Departamento de Mudanças Climáticas Gerência de Qualidade do Ar: Brasília, DF, Brazil, 2011;
8. ANP. Resumo Por Município - Posto Available online: [http://preco.anp.gov.br/include/Resumo\\_Por\\_Municipio\\_Posto.asp](http://preco.anp.gov.br/include/Resumo_Por_Municipio_Posto.asp) (accessed on 20 August 2020).
